# Supplementary material for: Active Methanotrophs and Their Response to Temperature in Marine Environments: An Experimental Study
Source: MDPI journal article supplement (doi:10.3390/jmse9111261), 2021-11-12
Supplement: s1 [file s1]

**Table S1.** CH<sub>4</sub> contents at subsequent time points (nmol) in the headspace in BB and ECS incubations.

| BB Incubation at 4 °C |               |               | BB Incubation at 15 °C |               |               | BB Incubation at 28 °C |               |               |
|-----------------------|---------------|---------------|------------------------|---------------|---------------|------------------------|---------------|---------------|
| Days                  | Treatment- #1 | Treatment- #2 | Days                   | Treatment- #1 | Treatment- #2 | Days                   | Treatment- #1 | Treatment- #2 |
| 0                     | 1581          | 1437          | 0                      | 1636          | 1685          | 0                      | 1805          | 1835          |
| 10                    | 1454          | 1406          | 5                      | 1529          | 1630          | 3                      | 1685          | 1791          |
| 20                    | 1462          | 1381          | 15                     | 1506          | 1640          | 6                      | 1552          | 1695          |
| 30                    | 1407          | 1380          | 30                     | 1446          | 1584          | 7                      | 1543          | 1676          |
| 40                    | 1423          | 1354          | 37                     | 1429          | 1551          | 10                     | 1378          | 1556          |
| 55                    | 1391          | 1377          | 45                     | 1389          | 1492          | 12                     | 1255          | 1451          |
| 70                    | 1418          | 1336          | 50                     | 1268          | 1414          | 14                     | 1025          | 1178          |
| 85                    | 1413          | 1340          | 56                     | 1133          | 1246          | 17                     | 538           | 760           |
| 100                   | 1394          | 1351          | 59                     | 1043          | 1197          | 18                     | 472           | 577           |
| 120                   | 1375          | 1325          | 61                     | 968           | 1082          | 19                     | 256           | 494           |
| 140                   | 1381          | 1317          | 65                     | 767           | 895           | 20                     | 143           | 282           |
| 160                   | 1389          | 1309          | 68                     | 613           | 720           | 21                     | 7             | 204           |
| 180                   | 1336          | 1281          | 70                     | 517           | 630           | 24                     | 0             | 0             |
| 200                   | 1216          | 1198          | 71                     | 379           | 509           |                        |               |               |
| 210                   | 1175          | 1123          | 72                     | 114           | 253           |                        |               |               |
| 220                   | 1106          | 1081          | 75                     | 0             | 0             |                        |               |               |
| 230                   | 1058          | 1065          |                        |               |               |                        |               |               |
| 240                   | 1024          | 992           |                        |               |               |                        |               |               |
| 250                   | 980           | 943           |                        |               |               |                        |               |               |
| 0                     | 1735          | 1856          | 0                      | 1520          | 1389          | 0                      | 1979          | 1861          |
| 10                    | 1624          | 1787          | 7                      | 1395          | 1382          | 7                      | 1874          | 1756          |
| 20                    | 1593          | 1749          | 14                     | 1355          | 1371          | 14                     | 1663          | 1597          |

|     |      |      |    |      |      |    |      |      |
|-----|------|------|----|------|------|----|------|------|
| 30  | 1563 | 1692 | 21 | 1320 | 1342 | 19 | 1347 | 1360 |
| 40  | 1553 | 1678 | 28 | 1260 | 1243 | 24 | 918  | 620  |
| 55  | 1527 | 1661 | 35 | 1275 | 1181 | 29 | 463  | 198  |
| 70  | 1511 | 1595 | 42 | 1198 | 1118 | 34 | 0    | 0    |
| 85  | 1478 | 1544 | 49 | 927  | 923  |    |      |      |
| 100 | 1376 | 1543 | 56 | 764  | 763  |    |      |      |
| 120 | 1343 | 1507 | 63 | 575  | 567  |    |      |      |
| 140 | 1337 | 1493 | 70 | 397  | 473  |    |      |      |
| 160 | 1316 | 1470 |    |      |      |    |      |      |

---

Note: #1 and #2 refer to the experimental treatments.

**Table S2.** CH<sub>4</sub> oxidation rate (μmol/gdw/day) of each treatment in BB and ECS incubations.

| Area | Temperature | Treatment- #1 | R <sup>2</sup> | Treatment- #2 | R <sup>2</sup> |
|------|-------------|---------------|----------------|---------------|----------------|
| BB   | 4 °C        | 0.058         | 0.99           | 0.066         | 0.97           |
|      | 15 °C       | 0.627         | 0.89           | 0.648         | 0.91           |
|      | 28 °C       | 1.585         | 0.95           | 1.689         | 0.98           |
| ECS  | 4 °C        | 0.647         | 0.92           | 0.471         | 0.92           |
|      | 15 °C       | 2.975         | 0.99           | 2.253         | 0.97           |
|      | 28 °C       | 1.413         | 0.96           | 1.365         | 0.99           |

Note: #1 and #2 refer to the experimental treatments.

**Table S3.** Abundance of pmoA genes (copies/g) in each sediment sample after BB and ECS incubations.

| Area | Temperature | Treatment- #1       | Treatment- #2       |
|------|-------------|---------------------|---------------------|
| BB   | 4 °C        | $5.733 \times 10^5$ | $6.967 \times 10^5$ |
|      | 15 °C       | $3.528 \times 10^7$ | $2.348 \times 10^7$ |
|      | 28 °C       | $1.561 \times 10^9$ | $1.390 \times 10^9$ |
| ECS  | 4 °C        | $3.572 \times 10^5$ | $6.155 \times 10^5$ |
|      | 15 °C       | $1.550 \times 10^9$ | $9.480 \times 10^8$ |
|      | 28 °C       | $2.056 \times 10^8$ | $7.626 \times 10^8$ |

Note: #1 and #2 refer to the experimental treatments.

**Table S4.** Number of sequences for each sample in BB and ECS incubations

| Area | Temperature | Sample  | Sequences |
|------|-------------|---------|-----------|
| BB   | -           | Initial | 14020     |
|      | 4 °C        | #1      | 15758     |
|      |             | #2      | 18291     |
|      | 15 °C       | #1      | 19100     |
|      |             | #2      | 20713     |
|      | 28 °C       | #1      | 10065     |
|      |             | #2      | 12033     |
|      | -           | Initial | 10967     |
| ECS  | 4 °C        | #1      | 13342     |
|      |             | #2      | 12551     |
|      | 15 °C       | #1      | 22117     |
|      |             | #2      | 21390     |
|      | 28 °C       | #1      | 29599     |
|      |             | #2      | 13646     |
|      | -           | Initial | 10967     |
|      | -           | Initial | 10967     |

Note: #1 and #2 refer to the experimental treatments.
